# Supplementary material for: HIV Populations Shift After Tuberculosis Associated Immune Reconstitution Inflammatory Syndrome: Implications For HIV Remission
Source: Research Square preprint supplement (doi:10.21203/rs.3.rs-105550/v1), 2020-11-30
Supplement: Supplementary file 2 [file bfacbf815da31115416612f2.docx]

**(a) (b) (c)**

**(d) (e)**

**Supplementary Figure 1.** Total CD4+ T cell counts up to the first 10 weeks of cART in (a) ~~~~ TBI, (b) ~~~~ TBNI and (c) ~~~~ NTBNI study participants and CD4 counts during (d) the first 6 months of cART and (e) subsequent 1-2 years of cART.

**(a) (b)**

*R=0.8, p<0.0001*

**R=0.8, p=0.03*

*R=0.5, p=0.01*

**R=0.1, p=0.9*

*R=0.6, p=0.005*

**R=0.4, p=0.2*

*R=0.6, p=0.004*

**R=0.5, p=0.2*

**(c) (d)**

*R=0.4, p=0.04*

**R=0.3, p=0.4*

**(e) (f)**

*R=0.6, p=0.01*

**R=0.8, p=0.03*

**(g)**

*R=0.6, p=0.0007*

**R=0.4, p=0.2*

**Supplementary Figure 2.** Associations between pre-therapy plasma HIV RNA levels (x-axis; Log10 scale) and plasma levels of (a) TNF-α (b) IL-2 (c) IL-6 (d) IL-10 (e) CXCL-10 (f) IL-27 (g) D-Dimer (y-axes).  TBI,  TBNI,  NTBNI. R and p-values from Spearman correlations for all participants and the TBI group only (*) are shown.

**Supplementary Figure 3.** Longitudinal plasma HIV RNA levels (**~~l~~**; left y-axis) and total CD4+ T cells **(~~n~~**; right y-axis). Open symbols were below the limit of detection. TBI = P3, P5, P6, P7, P12, P13, P15, P23, P24. TBNI = P1, P2, P4, P11, P14, P21, P22, P28, P29. NTBNI = P8, P9, P10, P17, P18, P19, P20, P25, P26, P27.

**(a)**

**(b)**

**Supplementary Figure 4.** Cell associated (CA) HIV DNA (a) in whole blood (µL) and (b) normalized to CD4+ cell populations (per million CD4+ T cells) prior to cART initiation (pre-therapy), 2-4 weeks after cART initiation (short-term cART) and 26-200 weeks after cART initiation (long-term cART).  TBI  TBNI,  NTBNI. No statistically significant differences noted by Kruskal-Wallis tests with Dunn’s corrections for multiple comparisons.

**Supplementary Figure 5.** Longitudinal cell associated (CA) HIV DNA per million CD4+ T cells. TBI (red trendlines), TBNI (blue trendlines) and NTBNI (black trendlines).

**(a)**

**
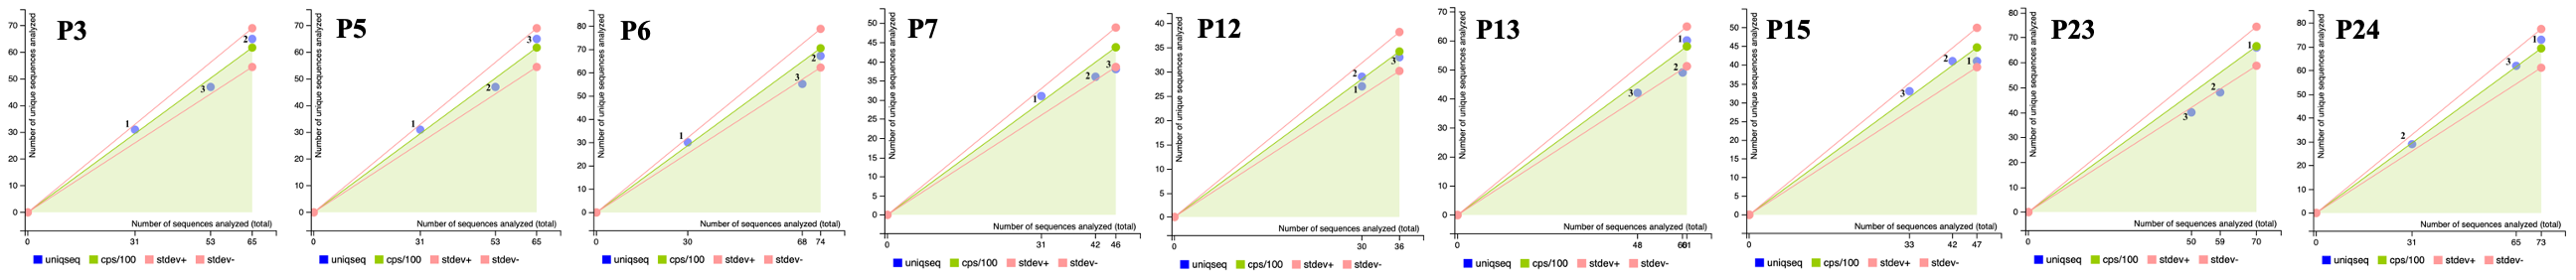
**

**(b)**

**
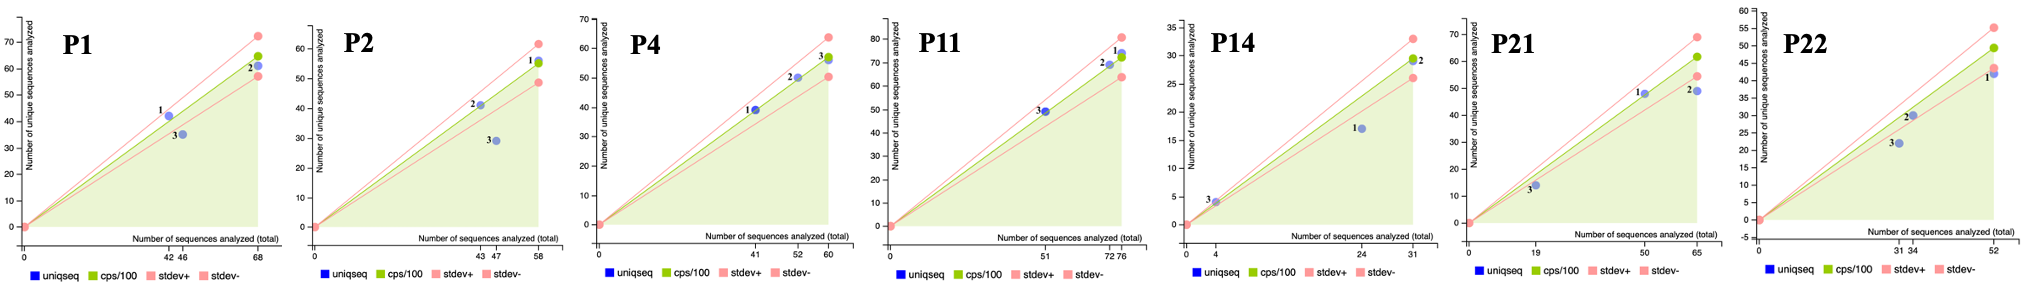
**

**(c)**

**
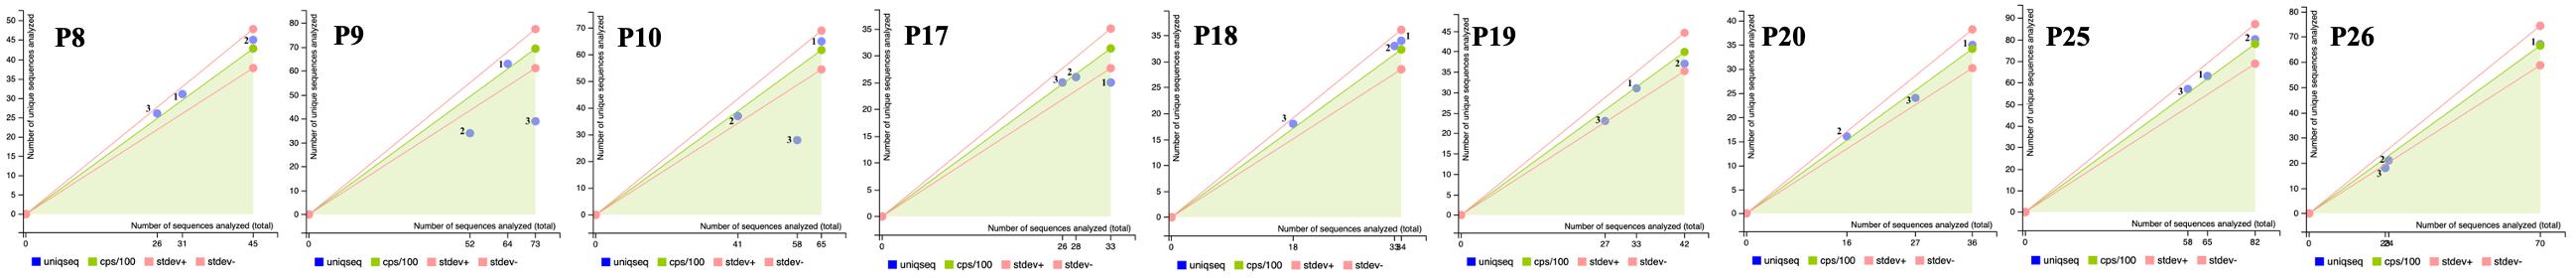
**

**Supplementary Figure 6.** Clonal prediction scores (CPS) for longitudinal cell associated (CA) HIV DNA populations during cART. (a) TBI (b) TBNI and (c) NTBNI groups. CPS (green solid line) with standard deviations (pink dotted lines) shown. Number of unique variants (y-axis) and the total number of sequences generated by SGS (x-axis) prior to cART (1), after short-term (2) and long-term (3) cART are indicated (blue dots). Data point ≤ CPS indicates that identical sequences within the populations likely represent HIV infected cell clones.

**(a) (b) (c)**

**Supplementary Figure 7.** Neighbor-Joining trees of HIV populations representative of the TBI (a) TBNI (b) and NTBNI groups. Viral populations were derived from plasma RNA (m) and PBMC DNA (m) prior to cART initiation, PBMC DNA shortly after cART initiation (n) and after prolonged cART (u). * bootstrap values >70.


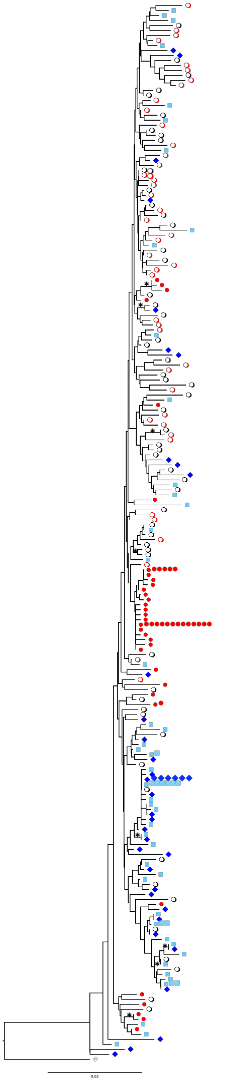


**Supplementary Figure 8.** Neighbor-Joining tree of HIV populations detected in TBI study participant P13. Viral populations were derived from plasma RNA (m) and PBMC DNA (m) prior to cART initiation, PBMC DNA after 3 weeks on cART (n), and 64 weeks of cART (u) and HIV RNA from rebound viremia after cART was stopped (l), which was 76 weeks after cART was initiated. *bootstrap vales >70.

| PID | Sex  (M/F) | | Age  (years) | Race | Risk | HIV Subtype | cART  components | Baseline  CD4 count  (cells/µL) | Baseline  HIV RNA level  (Log10 copies/mL) | Comorbidities / Coinfections |
| --- | --- | --- | --- | --- | --- | --- | --- | --- | --- | --- |
|  | | **TB, IRIS (N=9)** | | | | | | | | |
| P3 | F | | 34 | Black | Hetero | G | FTC/TDF/RTG | 49 | 5.9 | **d**TB , KS |
| P5 | F | | 33 | Black | Hetero | CRF01_AE | FTC/TDF/RTG | 98 | 6.6 | **d**TB, **d**Histoplasmosis, KS |
| P6 | M | | 42 | Black | Hetero | CRF02_AG | FTC/TDF/EFV/RTG | 84 | 6.3 | **d**TB , HSV |
| P7 | M | | 45 | Black | Hetero | B | FTC/TDF/EFV | 41 | 5.6 | **d**TB |
| P12 | F | | 33 | Black | Hetero | A | FTC/TDF/EFV | 6 | 4.9 | TB adenitis, PCP, HSV |
| P13 | M | | 41 | White | Hetero | B | FTC/TDF/EFV | 20 | 5.0 | **d**TB |
| P15 | M | | 46 | Black | Hetero | B | FTC/3TC/EFV | 52 | 5.0 | **m**TB, chronic Hep B |
| P23 | F | | 30 | Black | Hetero | A | FTC/TDF/EFV | 6 | 6.0 | **d**TB, Multicentric Castleman's disease, HSV, Cryptosporidium, Hep B |
| P24 | F | | 48 | Black | Hetero | B | FTC/TDF/EFV | 48 | 5.9 | **d**TB, HSV |
|  | | **TB, No IRIS (N=9)** | | | | | | | | |
| P1 | M | | 34 | Black | Hetero | C | FTC/TDF/EFV | 12 | 5.1 | **p**TB, HSV, Strongyloides |
| P2 | F | | 51 | White | Hetero | B | RAL/TDF/FTC | 32 | 5.2 | **p**TB , HSV |
| P4 | M | | 36 | Black | Hetero | B | FTC/TDF/EFV | 75 | 4 | **p**TB , HSV |
| P11 | M | | 31 | White | Hetero | B | FTC/TDF/EFV | 109 | 4.6 | TB adenitis, Zoster, HSV |
| P14 | F | | 55 | Black | Hetero | D | FTC/3TC/EFV | 74 | 4 | **p**TB , KS, HSV |
| P21 | F | | 45 | Black | Hetero | CRF02_AG | FTC/TDF/EFV | 20 | 5.4 | **d**TB, Schistosomiasis |
| P22 | F | | 35 | White | Hetero | B | FTC/TDF/EFV | 99 | 4.8 | **p**TB |
| P28 | M | | 47 | Black | Hetero | CRF02_AG | FTC/TDF/EFV | 5 | 5.5 | **d**TB, Schistosomiasis |
| P29 | F | | 43 | Asian | Hetero | CRF01_AE | FTC/TDF/EFV | 36 | 5.5 | **d**TB, CMV retinitis and uveitis IRIS |
|  | | **No TB, No IRIS (N=10)** | | | | | | | | |
| P8 | M | | 40 | Black | MSM | B | FTC/TDF/EFV | 25 | 4.3 | None documented |
| P9 | M | | 41 | Black | Hetero | C | FTC/TDF/EFV | 22 | 4.8 | Unusually high, persistent blood EBV, no lymphoma |
| P10 | F | | 39 | Black | Hetero | C | FTC/TDF/EFV | 9 | 5.7 | None documented |
| P17 | M | | 31 | White | Hetero | B | FTC/TDF/EFV | 14 | 4.5 | Pre-ART PCP and prednisone |
| P18 | F | | 29 | Black | Hetero | B | FTC/TDF/EFV | 14 | 4.5 | None documented |
| P19 | M | | 34 | Black | Bisex | B | FTC/TDF/EFV | 78 | 5 | None documented |
| P20 | F | | 22 | Black | Hetero | CRF02_AG | FTC/TDF/EVG/c | 30 | 6.4 | None documented |
| P25 | F | | 32 | White | Hetero | B | ABC/3TC/DTG | 41 | 4.3 | HSV, Zoster, Mumps |
| P26 | M | | 40 | Black | Hetero | C | FTC/TAF/EVG/c | 22 | 4.6 | Cryptococcal pneumonia, Zoster |
| P27 | F | | 37 | Black | Hetero | A | FTC/TDF/ATZ/r | 74 | 5.5 | PCP, thrush, HSV, Latent TB (PPD+) |

**Supplementary Table 1.** Baseline characteristics of study participants. M/F = Male/Female. TB = Tuberculosis, HSV = Herpes Simplex Virus 1/2. CMV = cytomegalovirus. Zoster = Herpes zoster / Shingles. KS = Kaposi’s Sarcoma. Hep B = Hepatitis B. T prefixes: **d**=disseminated; **m**=milliary; **p**=pulmonary). FTC = Emtricitabine. 3TC= Lamivudine. EFV = Efavirenz. TDF = Tenofovir. RTG = Raltegravir. ABC = Abacavir. DTG = Dolutegravir. TAF = tenofovir alafenamide. EVG/c= Elvitegravir/cobicistat

| **Soluble Biomarker**  **(Concentration)** | **Baseline plasma levels** | | | **P-Values**  **(Kruskal-Wallis tests)** |
| --- | --- | --- | --- | --- |
| **Median [Range]** | | |
| **TBI** | **TBNI** | **NTBNI** |  |
| **D-Dimer (ng/mL)** | 2721 [394-10000] | 814.7 [367-2001] | 506 [195-3417] | 0.0061 |
| **MPO (pg/mL)** | 43498 [14024-149676] | 13778 [7183-106607] | 12477 [3960-54404] | 0.0246 |
| **IL-27 (pg/mL)** | 893 [406-1285] | 321 [159-427] | 217 [69-612] | 0.0003 |
| **CRP (ng/mL)** | 8250 [2895-31831] | 5374 [2718-14255] | 388 [69-11003] | 0.0504 |
| **GM-CSF (pg/mL)** | N/A | N/A | N/A | N/A |
| **IFN-gamma (pg/mL)** | 15 [2-614] | 6 [0.9-60] | 3 [<0.6-46] | 0.0464 |
| **IL-10 (pg/mL)** | 13 [1-22] | 4 [0.8-7] | 6 [0.7-15] | 0.1628 |
| **IL-12p70 (pg/mL)** | 0.6 [0.1-1.7] | 0.7 [0.1-1.4] | 0.6 [0.07-0.8] | 0.4925 |
| **IL-1beta (pg/mL)** | N/A | N/A | N/A | - |
| **IL-2 (pg/mL)** | 1.4 [0.2-2.5] | 0.6 [0.4-1.0] | 0.6 [0.1-1.1] | 0.059 |
| **IL-6 (pg/mL)** | 2.5 [1.4-3.7] | 0.9 [0.7-1.8] | 1.1 [0.6-2.9] | 0.0034 |
| **IL-8 (pg/mL)** | 12 [1.9-33] | 6 [0.7-8.3] | 5 [1.5-24] | 0.1738 |
| **TNF-alpha (pg/mL)** | 24 [11-47] | 11 [6-15] | 8 [3-15] | 0.0014 |
| **IP-10 (pg/mL)** | 6748 [2479-9790] | 2325 [1170-4264] | 1775 [313-5877] | 0.0157 |
| **IL-17 (pg/mL)** | N/A | N/A | N/A | - |
| **Hyaluronic Acid (ng/mL)** | 224 [150-324] | 86 [29-217] | 64 [27-135] | 0.0005 |
| **sCD14 (pg/mL)** | 4022700 [2221067-5085386] | 2543475 [2081701-4632428] | 1740187 [843627-3521106] | 0.0042 |
| **sTF (pg/mL)** | 71 [36-108] | 79 [8-105] | 89 [50-117] | 0.6454 |
| **sCD163 (pg/mL)** | 434 [25-1872] | 160 [0.2-746] | 156 [0.2-299] | 0.1813 |
| **Hepcidin (ng/mL)** | 300 [300-518] | 185 [101-335] | 124 [5-440] | 0.0637 |

**Supplementary Table 2.** Baseline plasma concentrations of soluble biomarkers and comparisons among those who did and did not develop IRIS. N/A indicates that the majority of biomarker concentrations were below the limit of detection or there was insufficient data for statistical analyses.

| **Soluble Biomarker**  **(Concentration)** | **Short term cART plasma levels** | | | **P-Values**  **(Kruskal-Wallis tests)** |
| --- | --- | --- | --- | --- |
| **Median [Range]** | | |
| **TBI** | **TBNI** | **NTBNI** |  |
| **D-Dimer (ng/mL)** | 3718 [1374-10000] | 527 [413-5553] | 392 [153-724] | 0.0003 |
| **MPO (pg/mL)** | 102088 [24151-250807] | 18198 [8313-113962] | 8681 [4145-40103] | 0.0011 |
| **IL-27 (pg/mL)** | 1585 [310-2270] | 323 [229-398] | 147 [110-423] | 0.0004 |
| **CRP (ng/mL)** | 64285 [15654-202407] | 17959 [3144-31445] | 745 [618-5915] | <0.0001 |
| **GM-CSF (pg/mL)** | N/A | N/A | N/A | - |
| **IFN-gamma (pg/mL)** | 39 [6-202] | 8 [2-57] | 1 [<0.6-31] | 0.0017 |
| **IL-10 (pg/mL)** | 16 [1-68] | 2.5 [0.6-8] | 4 [0.5-10] | 0.021 |
| **IL-12p70 (pg/mL)** | 0.9 [<0.6-5] | 0.6 [0.1-3] | 0.6 [0.3-0.7] | 0.0785 |
| **IL-1beta (pg/mL)** | 1.6 [0.6-19] | 0.61 [0.1-0.6] | 0.61 [0.02-0.6] | 0.0029 |
| **IL-2 (pg/mL)** | 1.4 [0.4-2.6] | 0.6 [0.4-1.5] | 0.6 [0.3-0.6] | 0.0909 |
| **IL-6 (pg/mL)** | 13 [2.5-46] | 1.6 [0.9-5] | 0.9 [0.4-2] | 0.0003 |
| **IL-8 (pg/mL)** | 8.9 [2-74] | 4 [1-7] | 1.3 [0.6-8] | 0.0054 |
| **TNF-α (pg/mL)** | 38 [12-100] | 9 [5-17] | 5 [2-8] | 0.0002 |
| **IP-10 (pg/mL)** | 5850 [1779-10505] | 948 [571-2172] | 656 [279-1206] | <0.0001 |
| **IL-17 (pg/mL)** | 1 [<0.6-3] | <0.6* | 0.6 [<0.6-0.8] | 0.0058 |
| **Hyaluronic Acid (ng/mL)** | 132 [61-695] | 28 [20-115] | 37 [21-96] | 0.0022 |
| **sCD14 (pg/mL)** | 4252465 [1538471-6619998] | 2585347 [2401578-3122187] | 1712054 [1070125-2521996] | 0.0016 |
| **sTF (pg/mL)** | 75 [35-91] | 88 [8-111] | 71 [50-134] | 0.9336 |
| **sCD163 (pg/mL)** | 397 [0.2-1481] | 65 [0.2-307] | 20 [0.2-135] | 0.0242 |
| **Hepcidin (ng/mL)** | 326 [300-795] | 159 [76-340] | 144 [98-231] | 0.0023 |

**Supplementary Table 3.** Plasma concentrations of soluble biomarkers and comparisons among those who did and did not develop IRIS after short-term cART (within 4 weeks of cART initiation), which was around the time the TBI group experienced symptoms of IRIS. The majority of GM-CSF (N/A) and IL-17 concentrations in the TBNI group (*) were below the limit of detection of the assay. For 2 and 3 we should try to add the 3 extar people when Maura gets a chance (and Ana redo stats), we can adjust later so won’t hold submission for that but please put in the to do list?

| Study Group | PID | Plasma HIV RNA level (copies/mL) | |
| --- | --- | --- | --- |
| Short-Term cART | Long-Term cART |
| TBI | P3 | 492 | <0.42 |
| P5 | 1896 | 0.91 |
| P6 | 149 | 0.86 |
| P7 | 200 | 6.5 |
| P12 | <50 | 0.94 |
| P13 | 406 | 5.2 |
| P15 | <50 | 0.44 |
| P23 | 321 | 2.6 |
| P24 | 254 | 0.88 |
| TBNI | P1 | 102 | 2.7 |
| P2 | 54 | 3.0 |
| P4 | 226 | <0.50 |
| P11 | <50 | 0.45 |
| P14 | <50 | 2.5 |
| P21 | <50 | 0.38 |
| P22 | <50 | <0.37 |
| P28 | <50 | <0.38 |
| P29 | <50 | 0.91 |
| NTBNI | P8 | <50 | <0.40 |
| P9 | 84 | 3.2 |
| P10 | 369 | 1.4 |
| P17 | <50 | 0.83 |
| P18 | <50 | <0.45 |
| P19 | <50 | 0.91 |
| P20 | 333 | 6.9 |
| P25 | <50 | 1.4 |
| P26 | <50 | 1.8 |
| P27 | 127 | <0.44 |

**Supplementary Table 4.** Plasma HIV RNA levels on cART at each sampling time point used for single genome sequencing. Short-term cART samples in the TB-IRIS group were during their documented IRIS event. A single copy assay was used to detect HIV RNA levels after >96 weeks (long-term) of cART.

| Study group | Patient ID | Pre-therapy Plasma RNA | | Pre-therapy PBMC DNA | | Short-term cART | | Long-term cART | |
| --- | --- | --- | --- | --- | --- | --- | --- | --- | --- |
| APD (%) | # Sequences | APD (%) | # Sequences | APD (%) | # Sequences | APD (%) | # Sequences |
| TBI | P3 | 1.9 | 53 | 2.1 | 31 | 2.2 | 65 | 2.3 | 47 |
| P5 | 1.5 | 48 | 1.5 | 37 | 1.6 | 40 | 1.6 | 46 |
| P6 | 2.3 | 39 | 2.4 | 30 | 2.0 | 36 | 2.6 | 55 |
| P7 | 1.0 | 94 | 1.4 | 31 | 1.4 | 38 | 1.4 | 36 |
| P12 | 1.5 | 36 | 1.5 | 29 | 1.9 | 32 | 2.2 | 52 |
| P13 | 1.0 | 44 | 1.2 | 60 | 1.1 | 49 | 1.1 | 42 |
| P15 | 2.1 | 37 | 2.3 | 41 | 2.2 | 41 | 2.2 | 33 |
| P23 | 2.1 | 72 | 1.9 | 66 | 1.9 | 40 | 1.8 | 48 |
| P24 | 1.5 | 42 | 1.9 | 73 | 1.7 | 29 | 1.7 | 62 |
| TBNI | P1 | 1.4 | 58 | 1.5 | 42 | 1.4 | 61 | 1.5 | 35 |
| P2 | 1.1 | 22 | 1.1 | 56 | 1.2 | 41 | 1.0 | 29 |
| P4 | 1.4 | 62 | 1.4 | 39 | 1.5 | 50 | 1.3 | 56 |
| P11 | 1.3 | 40 | 1.4 | 74 | 1.2 | 69 | 1.5 | 49 |
| P14 | 1.9 | 79 | 1.5 | 17 | 1.5 | 29 | 1.5 | 4 |
| P21 | 1.8 | 51 | 1.8 | 48 | 1.7 | 49 | 1.7 | 26 |
| P22 | 1.3 | 43 | 1.5 | 42 | 1.7 | 30 | 1.6 | 22 |
| NTBNI | P8 | 1.7 | 51 | 1.9 | 31 | 2.0 | 45 | 2.2 | 26 |
| P9 | 1.7 | 71 | 1.8 | 63 | 1.8 | 34 | 1.8 | 39 |
| P10 | 0.8 | 62 | 0.8 | 65 | 0.6 | 37 | 0.5 | 28 |
| P17 | 0.8 | 24 | 0.9 | 25 | 0.9 | 26 | 1.1 | 25 |
| P18 | 1.4 | 35 | 1.5 | 34 | 1.6 | 33 | 1.6 | 18 |
| P19 | 0.5 | 48 | 0.5 | 31 | 0.7 | 37 | 0.3 | 23 |
| P20 | 0.9 | 43 | 0.9 | 35 | 0.8 | 16 | 1.0 | 24 |
| P25 | 1.1 | 40 | 1.2 | 63 | 1.1 | 80 | 1.2 | 57 |
| P26 | 1.6 | 73 | 1.8 | 67 | 1.6 | 21 | 2.0 | 18 |

**Supplementary Table 5.** Single genomes derived from PBMC HIV DNA and percent average pairwise distance (APD) of these populations before and during cART.

| Study Group | PID | Probability of panmictic PBMC HIV DNA and pretherapy HIV RNA populations | | | | | |
| --- | --- | --- | --- | --- | --- | --- | --- |
| All sequences | | | No identical sequences | | |
| Pretherapy | Short-term cART | Long-term cART | Pretherapy | Short-term cART | Long-term cART |
| TBI | P3 | 1.70E-02 | 2.00E-05 | 0.00E+00 | 4.70E-01 | 7.40E-02 | 4.10E-04 |
| P5 | 3.90E-03 | 2.50E-04 | 0.00E+00 | 7.60E-02 | 3.70E-04 | 0.00E+00 |
| P6 | 3.60E-01 | 2.70E-03 | 0.00E+00 | 5.10E-01 | 2.80E-02 | 0.00E+00 |
| P7 | 1.00E-04 | 0.00E+00 | 0.00E+00 | 6.00E-04 | 3.10E-03 | 0.00E+00 |
| P12 | 5.40E-01 | 8.30E-04 | 9.00E-05 | 5.60E-01 | 7.00E-04 | 1.10E-04 |
| P13 | 2.00E-03 | 0.00E+00 | 0.00E+00 | 2.20E-03 | 0.00E+00 | 0.00E+00 |
| P15 | 4.00E-02 | 8.00E-05 | 8.70E-04 | 6.10E-02 | 8.90E-02 | 1.00E-03 |
| P23 | 1.30E-02 | 0.00E+00 | 0.00E+00 | 6.80E-01 | 9.00E-05 | 0.00E+00 |
| P24 | 3.50E-01 | 0.00E+00 | 0.00E+00 | 6.50E-01 | 1.00E-05 | 0.00E+00 |
| TBNI | P1 | 9.30E-02 | 0.00E+00 | 0.00E+00 | 8.20E-01 | 2.30E-01 | 8.50E-03 |
| P2 | 6.30E-01 | 8.90E-03 | 1.10E-03 | 8.40E-01 | 1.60E-02 | 1.90E-03 |
| P4 | 7.50E-04 | 0.00E+00 | 0.00E+00 | 1.40E-02 | 2.10E-02 | 4.30E-04 |
| P11 | 2.30E-01 | 1.50E-02 | 1.90E-01 | 1.80E-01 | 3.80E-02 | 3.30E-01 |
| P14 | 5.00E-05 | 3.00E-05 | 8.70E-02 | 2.20E-01 | 1.40E-03 | 1.20E-01 |
| P21 | 7.80E-03 | 1.00E-05 | 1.00E-05 | 6.40E-01 | 1.10E-01 | 4.10E-01 |
| P22 | 7.80E-03 | 1.00E-05 | 1.00E-05 | 5.30E-01 | 1.60E-03 | 4.90E-03 |
| NTBNI | P8 | 1.70E-02 | 2.00E-05 | 0.00E+00 | 6.00E-02 | 0.00E+00 | 1.40E-04 |
| P9 | 3.90E-03 | 2.50E-04 | 0.00E+00 | 2.90E-01 | 0.00E+00 | 0.00E+00 |
| P10 | 3.60E-01 | 2.70E-03 | 0.00E+00 | 9.70E-01 | 4.10E-01 | 6.80E-02 |
| P17 | 1.00E-04 | 0.00E+00 | 0.00E+00 | 1.40E-01 | 1.00E-02 | 6.10E-02 |
| P18 | 1.90E-01 | 6.00E-05 | 0.00E+00 | 2.30E-02 | 7.40E-03 | 2.60E-03 |
| P19 | 2.00E-03 | 0.00E+00 | 0.00E+00 | 5.50E-01 | 4.10E-02 | 7.80E-01 |
| P20 | 4.00E-02 | 8.00E-05 | 8.70E-04 | 6.00E-03 | 3.80E-02 | 1.20E-03 |
| P25 | 1.00E-05 | 0.00E+00 | 0.00E+00 | 4.50E-04 | 1.90E-04 | 0.00E+00 |
| P26 | 1.80E-01 | 1.00E-05 | 2.00E-05 | 7.50E-01 | 0.00E+00 | 0.00E+00 |

**Supplementary Table 6.** Probabilities of panmixia between pre-therapy HIV RNA populations and all PBMC DNA populations (*1*). Populations were considered panmictic (grey) when probabilities were >1.00E+06 (p-value <10-9).

| Study Group | PID | Probability that PBMC HIV DNA and pre-therapy HIV RNA populations were compartmentalized | | |
| --- | --- | --- | --- | --- |
| Pre-therapy | Short-term cART | Long-term cART |
| TBI | P3 | 0.452 | 0.616 | 0.001 |
| P5 | 0.233 | 0 | 0 |
| P6 | 0.035 | 0.014 | 0 |
| P7 | 0 | 0.202 | 0 |
| P12 | 0.595 | 0.005 | 0.008 |
| P13 | 0.073 | 0 | 0 |
| P15 | 0.055 | 0.02 | 0.004 |
| P23 | 0.266 | 0 | 0 |
| P24 | 0.939 | 0 | 0 |
| TBNI | P1 | 0.98 | 0.144 | 0.004 |
| P2 | 0.583 | 0.47 | 0.192 |
| P4 | 0.079 | 0.038 | 0.013 |
| P11 | 0.564 | 0.005 | 0.131 |
| P14 | 0.098 | 0 | 0.037 |
| P21 | 0.558 | 0.03 | 0.018 |
| P22 | 0.547 | 0.033 | 0.037 |
| NTBNI | P8 | 0.365 | 0 | 0.28 |
| P9 | 0.018 | 0 | 0 |
| P10 | 0.986 | 0.808 | 0.004 |
| P17 | 0.139 | 0.132 | 0.583 |
| P18 | 0.036 | 0.024 | 0.05 |
| P19 | 0.998 | 0.331 | 1 |
| P20 | 0.159 | 0.022 | 0.005 |
| P25 | 0.019 | 0.043 | 0 |
| P26 | 0.287 | 0 | 0 |

**Supplementary Table 7.** Probability that migration events between PBMC HIV DNA and pretherapy HIV RNA populations occurred by chance. Compartmentalized highlighted in grey (*2*). Populations were compartmentalized when probabilities were 0 (p-value < 10-1)

| cART | Sample | 76 weeks |
| --- | --- | --- |
| Rebound Plasma HIV RNA |
| 0 weeks cART | Plasma HIV RNA | 0.00E+00 |
| PBMC HIV DNA | 0.00E+00 |
| 3 weeks cART | PBMC HIV DNA | 0.00E+00 |
| 64 weeks cART | PBMC HIV DNA | 0.00E+00 |

**Supplementary Table 8.** Probabilities of panmixia between rebound HIV RNA populations, HIV populations prior to cART initiation and PBMC HIV DNA populations (*1*). Populations were considered panmictic when probabilities were >1.00E+06 (p-value <10-9).

**References**

1. G. Achaz, M. Palmer S Fau - Kearney, F. Kearney M Fau - Maldarelli, J. W. Maldarelli F Fau - Mellors, J. M. Mellors Jw Fau - Coffin, J. Coffin Jm Fau - Wakeley, J. Wakeley, A robust measure of HIV-1 population turnover within chronically infected individuals. *Molecular Biology and Evolution* **21**, 1902-1912 (2004).

2. M. Slatkin, W. P. Maddison, A cladistic measure of gene flow inferred from the phylogenies of alleles.
